# Supplementary material for: Coupling the vanadium-induced amorphous/crystalline NiFe 2 O 4 with phosphide heterojunction toward active oxygen evolution reaction catalysts
Source: publisher site journal article supplement (doi:10.1515/ntrev-2022-0450), 2022-01-01
Supplement: Supplementary file 1 [file ntrev-2022-0450_sm.pdf]

## Supplementary material

Figures S1–S9

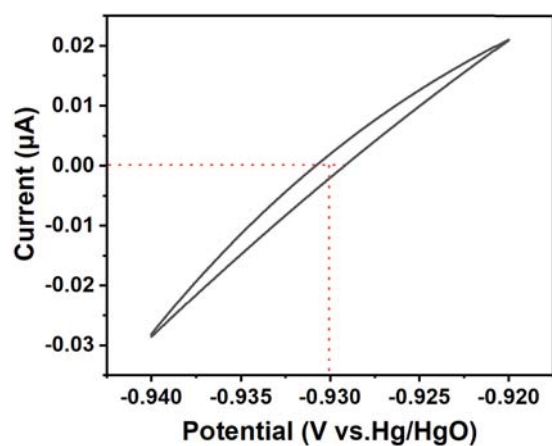

**Figure S1:** Hg/HgO reference electrode conversion voltage calibration.

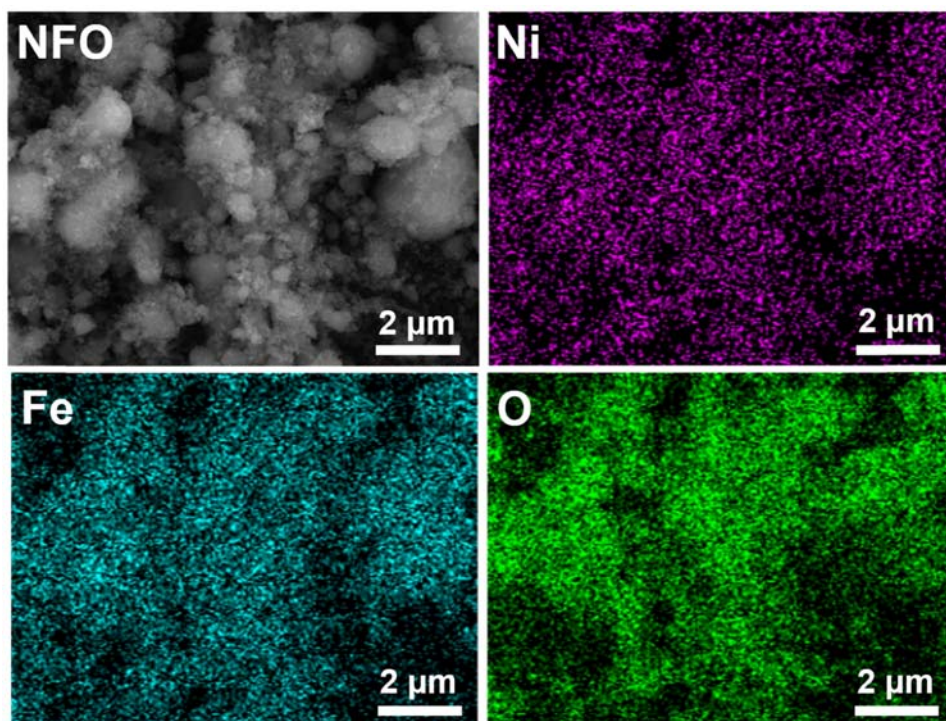

**Figure S2:** SEM images the corresponding elemental mapping of NFO.

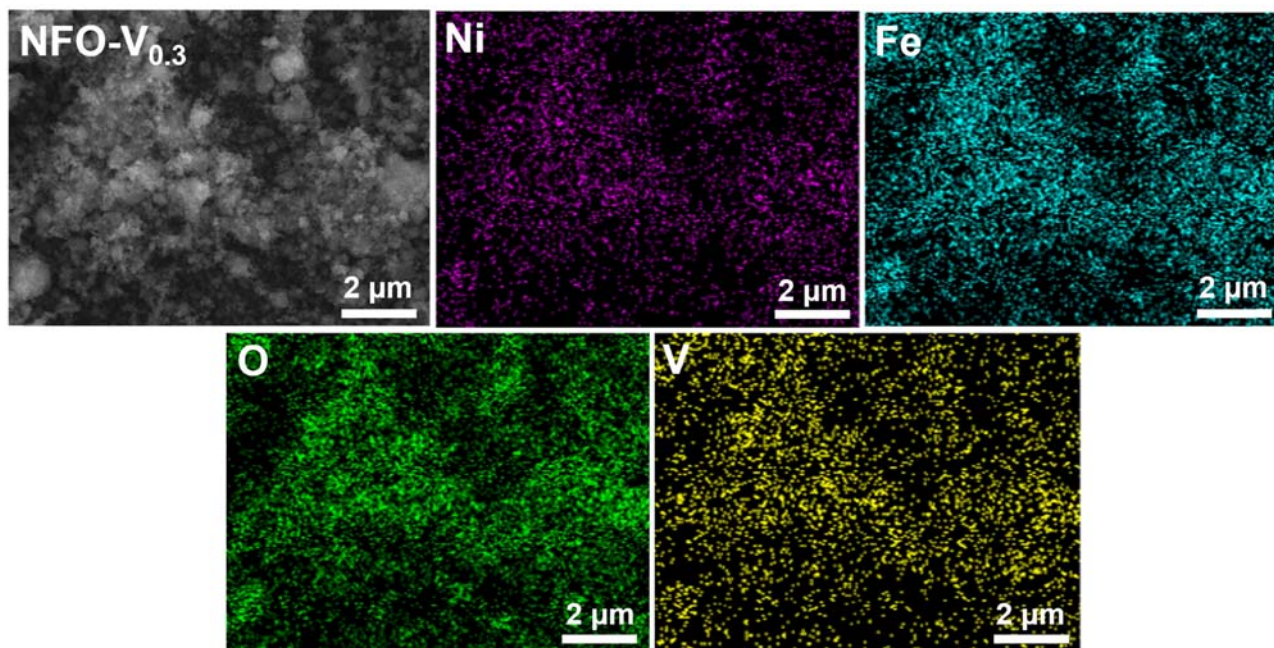

Figure S3: SEM images the corresponding elemental mapping of NFO- $V_{0.3}$ .

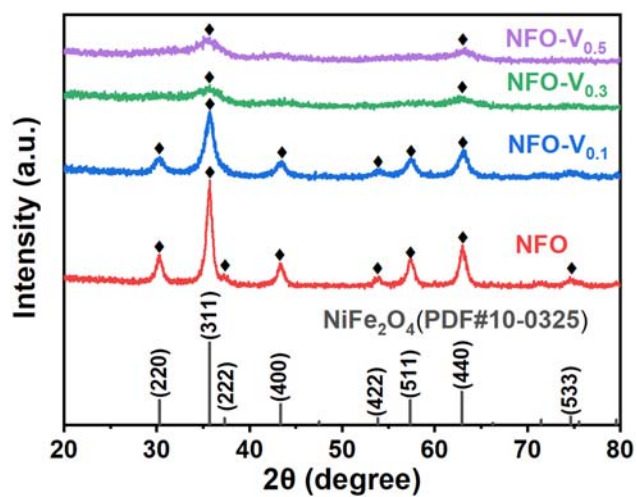

Figure S4: XRD patterns of NFO, NFO- $V_{0.1}$ , NFO- $V_{0.3}$  and NFO- $V_{0.5}$ .



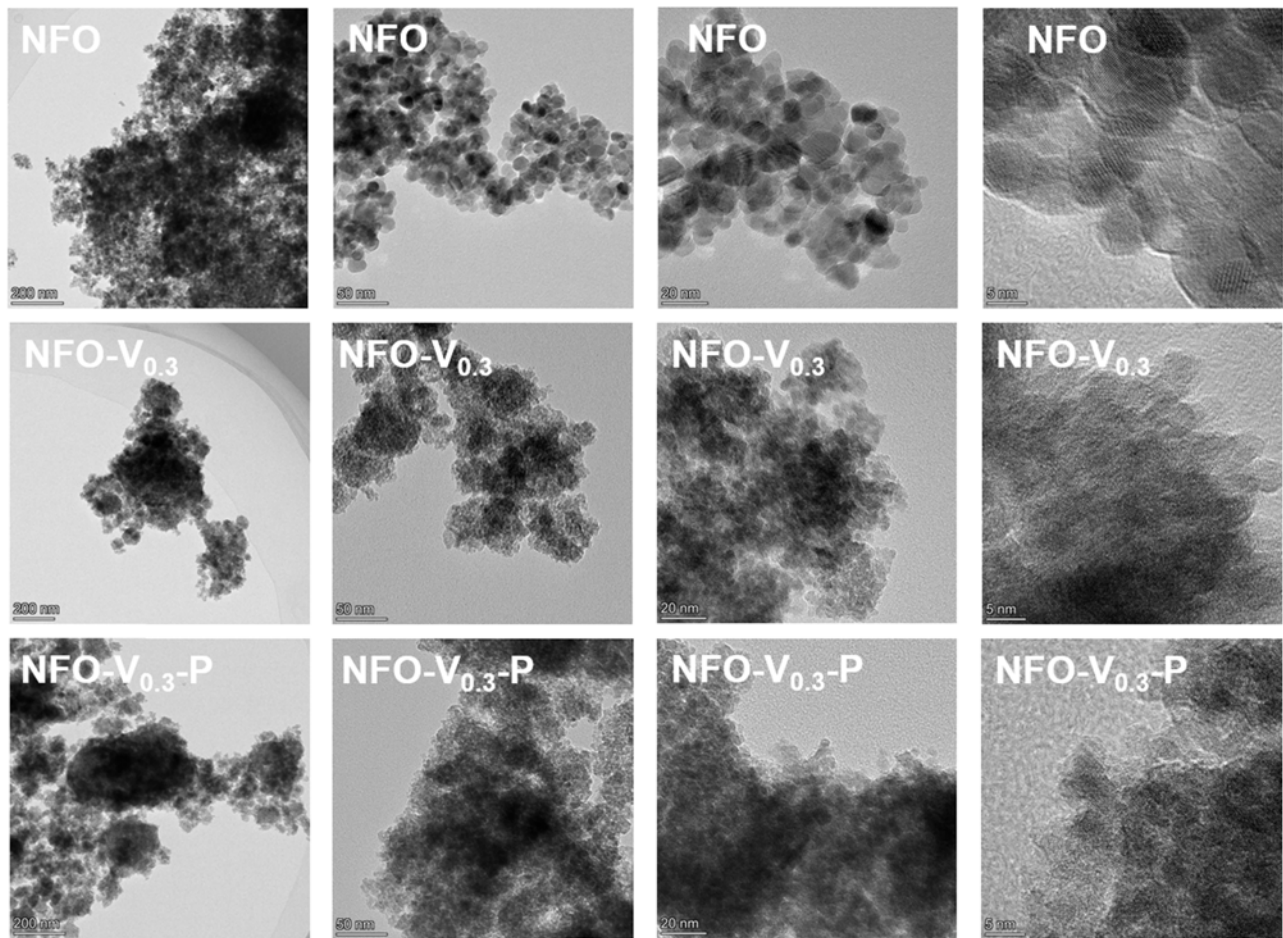

Figure S5: TEM images of NFO,  $\text{NFO-V}_{0.3}$  and  $\text{NFO-V}_{0.3}\text{-P}$ .

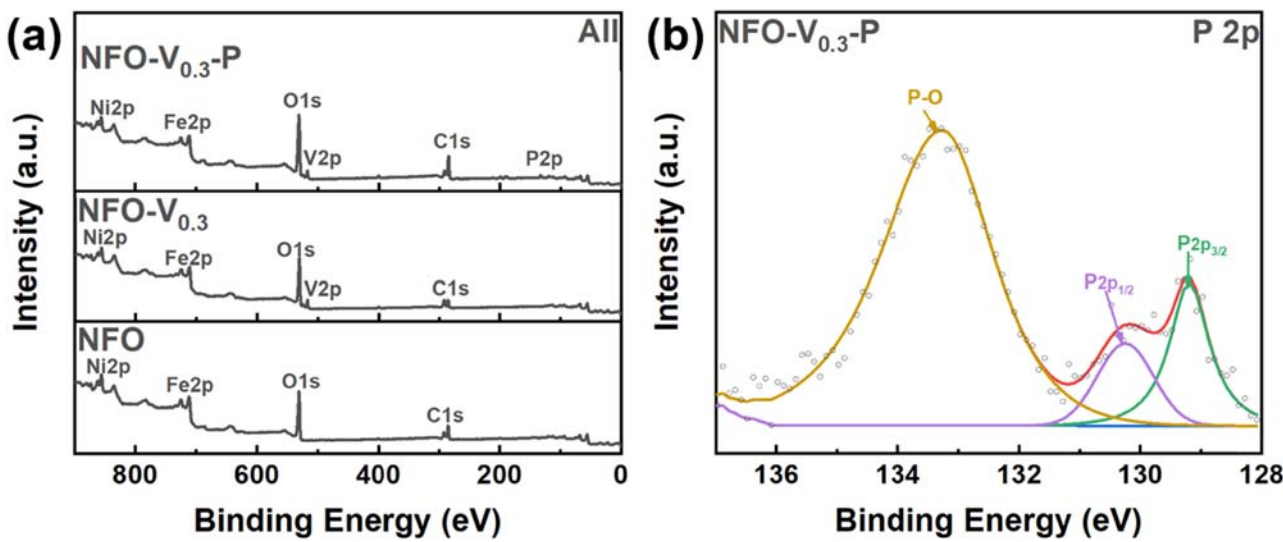

Figure S6: XPS spectra of (a)  $\text{NFO-V}_{0.3}$  in V 2p region and  $\text{NFO-V}_{0.3}\text{-P}$  in (b) V 2p region, (c) P 2p region.

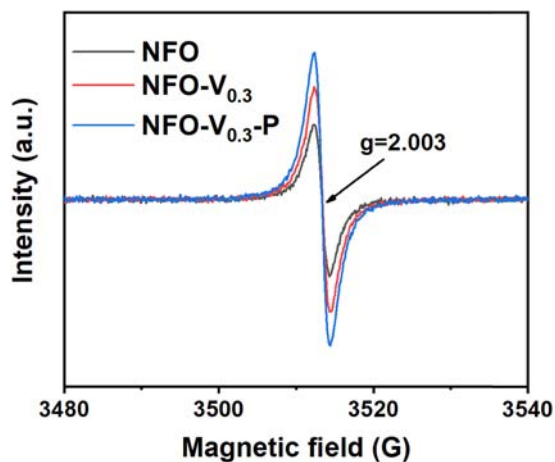

Figure S7: EPR spectra of NFO, NFO- $V_{0.3}$  and NFO- $V_{0.3}$ -P.

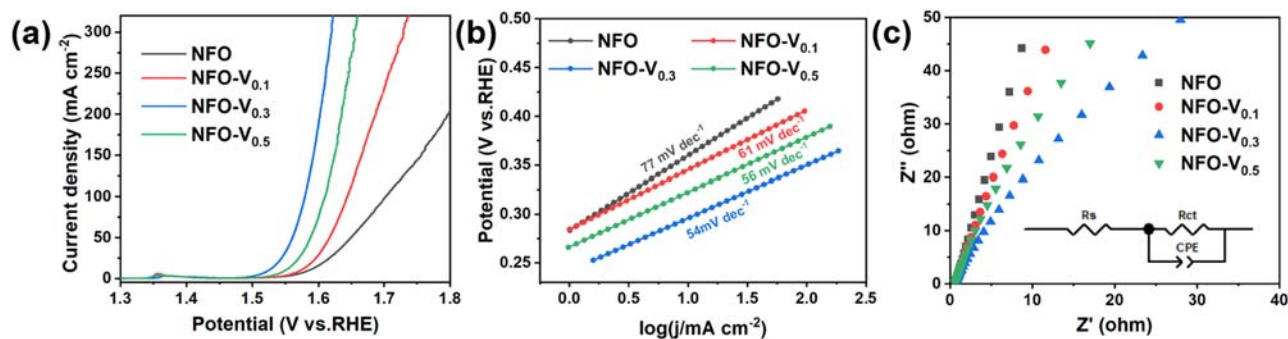

Figure S8: (a) iR-corrected LSV curves, (b) Tafel plots and (c) Nyquist plots of NFO, NFO- $V_{0.1}$ , NFO- $V_{0.3}$  and NFO- $V_{0.5}$ .

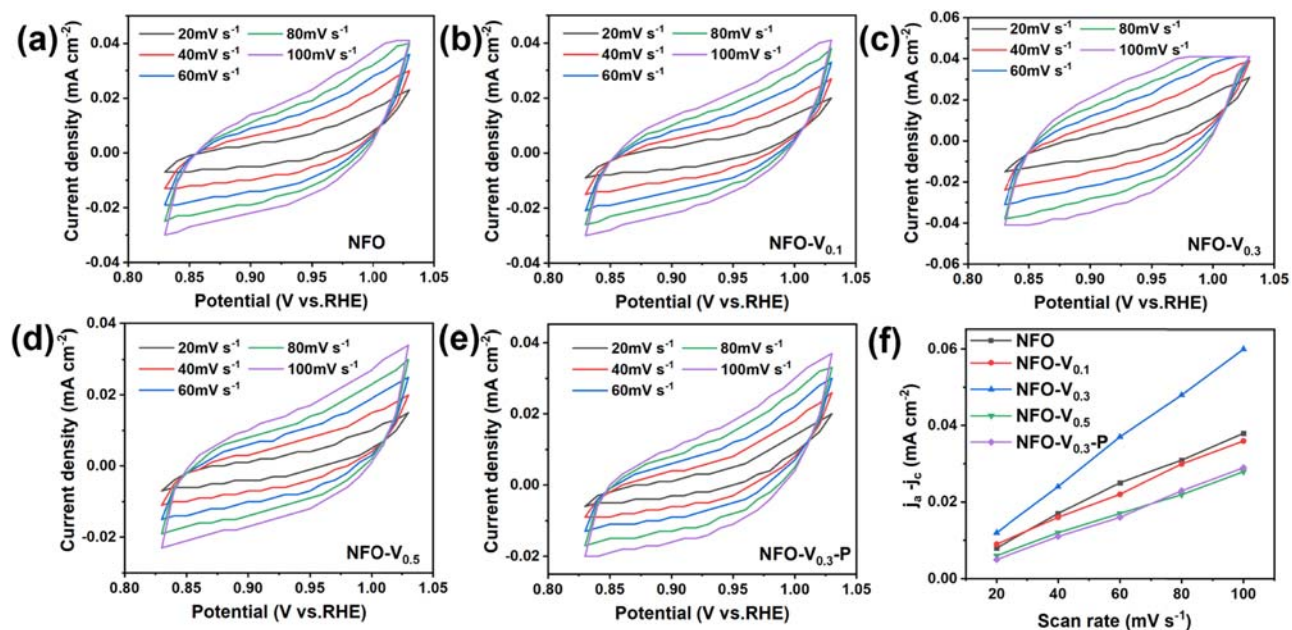

Figure S9: (a-e) CV curves of NFO, NFO- $V_{0.1}$ , NFO- $V_{0.3}$ , NFO- $V_{0.5}$  and NFO- $V_{0.3}$ -P. (f) The electrochemical C dl of the above catalysts.
